# Supplementary material
Source: MDPI journal article supplement (https://www.mdpi.com/2311-7524/7/11/485)
Supplement: s1 [file s1]

## Supplementary Materials: Supplementary Light with Increased Blue Fraction Accelerates Emergence and Improves Development of the Inflorescence in *Aechmea*, *Guzmania* and *Vriesea*

Elahe Javadi Asayesh <sup>1</sup>, Sasan AliniaEIFard <sup>1,\*</sup>, Naser Askari <sup>2</sup>, Mahmood Reza Roozban <sup>1</sup>, Mohammadhadi Sobhani <sup>1</sup>, Georgios Tsaniklidis <sup>3</sup>, Ernst J. Woltering <sup>4,5</sup> and Dimitrios Fanourakis <sup>6</sup>

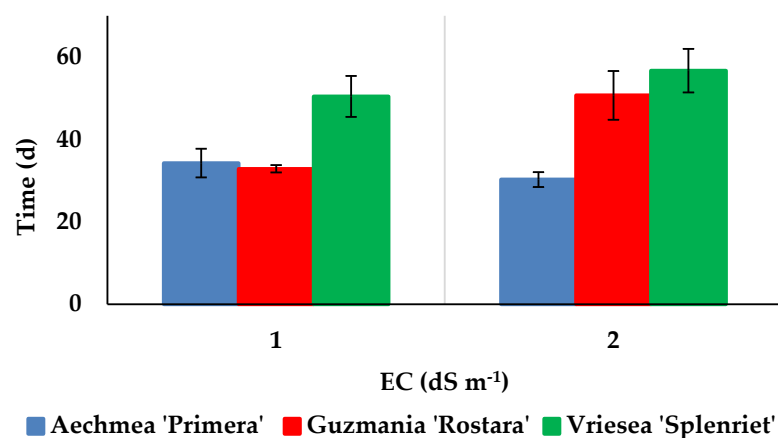

**Figure S1.** Time to inflorescence emergence following acetylene treatment as a function of nutrient solution electrical conductivity (EC) in the three species under study. Data of the four light treatments were pooled. Sixteen replicate plants were assessed per treatment. Error bars represent SEM.

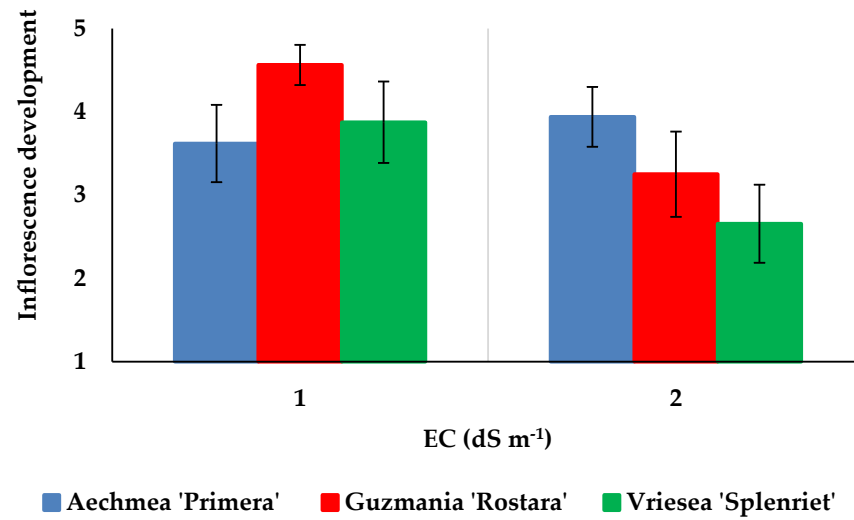

**Figure S2.** Inflorescence development as a function of nutrient solution electrical conductivity (EC) in the three species under study. Data of the four light treatments were pooled. The scale (1 to 5) characterizing inflorescence development is provided in Figure 1. Sixteen replicate plants were assessed per treatment. Error bars represent SEM.

**Table S1.** Effect of supplementary light and nutrient solution electrical conductivity (EC) on dry mass partitioning of the three species under study. The former treatment included control (no supplementary light), R90B10 [90 % red (R) and 10 % blue (B)], R80B20 (80 % R and 20 % B), and R70B30 (70 % R and 30 % B), while the latter 1 and 2 dS m<sup>-1</sup>. In traits, where the interaction of the two factors (light regime, EC) was significant, different letters indicate significant differences. FMR, flower mass ratio; LMR, leaf mass ratio; RMR, root mass ratio.

| Species                  |                   | <i>Aechmea</i> 'Primera' |                          |                          | <i>Guzmania</i> 'Rostara' |                          |                          | <i>Vriesea</i> 'Splendret' |                          |                          |
|--------------------------|-------------------|--------------------------|--------------------------|--------------------------|---------------------------|--------------------------|--------------------------|----------------------------|--------------------------|--------------------------|
| EC (dS m <sup>-1</sup> ) | Light regime      | LMR (g g <sup>-1</sup> ) | FMR (g g <sup>-1</sup> ) | RMR (g g <sup>-1</sup> ) | LMR (g g <sup>-1</sup> )  | FMR (g g <sup>-1</sup> ) | RMR (g g <sup>-1</sup> ) | LMR (g g <sup>-1</sup> )   | FMR (g g <sup>-1</sup> ) | RMR (g g <sup>-1</sup> ) |
| 1                        | Control           | 0.85a                    | 0.04                     | 0.11b                    | 0.62b                     | 0.20                     | 0.18                     | 0.76                       | 0.08                     | 0.17                     |
|                          | R90B10            | 0.73cd                   | 0.13                     | 0.14a                    | 0.57b                     | 0.25                     | 0.18                     | 0.72                       | 0.13                     | 0.15                     |
|                          | R80B20            | 0.63e                    | 0.21                     | 0.16a                    | 0.56b                     | 0.24                     | 0.20                     | 0.66                       | 0.18                     | 0.16                     |
|                          | R70B30            | 0.68de                   | 0.20                     | 0.12b                    | 0.57b                     | 0.28                     | 0.16                     | 0.66                       | 0.19                     | 0.15                     |
| 2                        | Control           | 0.81ab                   | 0.08                     | 0.11b                    | 0.79a                     | 0.05                     | 0.16                     | 0.88                       | 0.00                     | 0.12                     |
|                          | R90B10            | 0.78bc                   | 0.12                     | 0.10b                    | 0.74a                     | 0.10                     | 0.16                     | 0.83                       | 0.05                     | 0.12                     |
|                          | R80B20            | 0.69de                   | 0.22                     | 0.09b                    | 0.60b                     | 0.23                     | 0.17                     | 0.71                       | 0.12                     | 0.17                     |
|                          | R70B30            | 0.70de                   | 0.20                     | 0.10b                    | 0.60b                     | 0.24                     | 0.16                     | 0.77                       | 0.11                     | 0.12                     |
| P value                  | Light regime      | 0.0001**                 | 0.0001**                 | 0.13ns                   | 0.003**                   | 0.001**                  | 0.41ns                   | 0.005**                    | 0.013*                   | 0.34ns                   |
|                          | EC                | 0.07ns                   | 0.32ns                   | 0.0001**                 | 0.0003**                  | 0.003**                  | 0.03*                    | 0.0003**                   | 0.002**                  | 0.043*                   |
|                          | Light regime × EC | 0.04*                    | 0.39ns                   | 0.001**                  | 0.045*                    | 0.09ns                   | 0.39ns                   | 0.536ns                    | 0.98ns                   | 0.32ns                   |

ns= non-significant. Significance at the 0.05 probability level is indicated by \*, and significance at the 0.01 probability level by \*\*. #

**Table S2.** Effect of supplementary light and nutrient solution electrical conductivity (EC) on leaf osmotic potential, photosynthetic pigment content and SPAD value of *Aechmea* 'Primera' plants. The former treatment included control (no supplementary light), R90B10 [90 % red (R) and 10 % blue (B)], R80B20 (80 % R and 20 % B), and R70B30 (70 % R and 30 % B), while the latter 1 and 2 dS m<sup>-1</sup>. In traits, where the interaction of the two factors (light regime, EC) was significant, different letters indicate significant differences.

| EC (dS m <sup>-1</sup> ) | Light regime | Osmotic potential (MPa) | Chlorophyll content (mg g <sup>-1</sup> ) | Carotenoid content (mg g <sup>-1</sup> ) | SPAD value |
|--------------------------|--------------|-------------------------|-------------------------------------------|------------------------------------------|------------|
| 1                        | Control      | -0.85bc                 | 65.9                                      | 3.63                                     | 60.1       |
|                          | R90B10       | -0.89bc                 | 59.8                                      | 5.74                                     | 58.2       |
|                          | R80B20       | -0.72ab                 | 61.6                                      | 4.99                                     | 54.2       |
|                          | R70B30       | -0.63a                  | 71.2                                      | 2.17                                     | 86.5       |
| 2                        | Control      | -0.86bc                 | 62.5                                      | 4.79                                     | 64.3       |
|                          | R90B10       | -1.06c                  | 54.5                                      | 7.17                                     | 58.2       |
|                          | R80B20       | -1.06c                  | 54.5                                      | 6.90                                     | 54.9       |
|                          | R70B30       | -1.06c                  | 66.4                                      | 3.86                                     | 71.9       |
| P value                  | Light regime | 0.18ns                  | 0.0001**                                  | 0.0001**                                 | 0.0002**   |

|                   |          |         |         |        |
|-------------------|----------|---------|---------|--------|
| EC                | 0.0004** | 0.008** | 0.003** | 0.51ns |
| Light regime × EC | 0.04*    | 0.57ns  | 0.92ns  | 0.29ns |

ns= non-significant. Significance at the 0.05 probability level is indicated by \*, and significance at the 0.01 probability level by \*\*.

**Table S3.** Effect of supplementary light and nutrient solution electrical conductivity (EC) on leaf osmotic potential, photosynthetic pigment content and SPAD value of *Guzmania* 'Rostara' plants. The former treatment included control (no supplementary light), R90B10 [90 % red (R) and 10 % blue (B)], R80B20 (80 % R and 20 % B), and R70B30 (70 % R and 30 % B), while the latter 1 and 2 dS m<sup>-1</sup>. In traits, where the interaction of the two factors (light regime, EC) was significant, different letters indicate significant differences.

| EC (dS m <sup>-1</sup> ) | Light regime      | Osmotic potential (MPa) | Chlorophyll content (mg g <sup>-1</sup> ) | Carotenoid content (mg g <sup>-1</sup> ) | SPAD value |
|--------------------------|-------------------|-------------------------|-------------------------------------------|------------------------------------------|------------|
| 1                        | Control           | -0.33                   | 40.6                                      | 6.55                                     | 48.3       |
|                          | R90B10            | -0.36                   | 46.5                                      | 6.12                                     | 49.9       |
|                          | R80B20            | -0.34                   | 31.9                                      | 7.15                                     | 45.4       |
|                          | R70B30            | -0.32                   | 47.6                                      | 8.73                                     | 52.8       |
| 2                        | Control           | -0.38                   | 43.5                                      | 7.62                                     | 50.7       |
|                          | R90B10            | -0.49                   | 40.5                                      | 7.07                                     | 53.5       |
|                          | R80B20            | -0.44                   | 39.9                                      | 7.80                                     | 53.4       |
|                          | R70B30            | -0.40                   | 33.8                                      | 6.39                                     | 57.1       |
| <i>P</i> value           | Light regime      | 0.07ns                  | 0.59ns                                    | 0.69ns                                   | 0.013*     |
|                          | EC                | 0.0005**                | 0.34ns                                    | 0.93ns                                   | 0.001**    |
|                          | Light regime × EC | 0.45ns                  | 0.25ns                                    | 0.38ns                                   | 0.32ns     |

ns= non-significant. Significance at the 0.05 probability level is indicated by \*, and significance at the 0.01 probability level by \*\*.

**Table S4.** Effect of supplementary light and nutrient solution electrical conductivity (EC) on leaf osmotic potential, photosynthetic pigment content and SPAD value of *Vriesea* 'Splendret' plants. The former treatment included control (no supplementary light), R90B10 [90 % red (R) and 10 % blue (B)], R80B20 (80 % R and 20 % B), and R70B30 (70 % R and 30 % B), while the latter 1 and 2 dS m<sup>-1</sup>. In traits, where the interaction of the two factors (light regime, EC) was significant, different letters indicate significant differences.

| EC (dS m <sup>-1</sup> ) | Light regime      | Osmotic potential (MPa) | Chlorophyll content (mg g <sup>-1</sup> ) | Carotenoid content (mg g <sup>-1</sup> ) | SPAD value |
|--------------------------|-------------------|-------------------------|-------------------------------------------|------------------------------------------|------------|
| 1                        | Control           | -0.16                   | 33.3                                      | 5.88                                     | 53.6ab     |
|                          | R90B10            | -0.14                   | 30.6                                      | 6.27                                     | 52.3abc    |
|                          | R80B20            | -0.09                   | 41.0                                      | 7.53                                     | 48.4bc     |
|                          | R70B30            | -0.16                   | 36.2                                      | 6.77                                     | 55.8ab     |
| 2                        | Control           | -0.37                   | 29.7                                      | 6.49                                     | 43.1c      |
|                          | R90B10            | -0.16                   | 39.1                                      | 7.22                                     | 44.1c      |
|                          | R80B20            | -0.19                   | 35.0                                      | 6.77                                     | 50.1bc     |
|                          | R70B30            | -0.20                   | 34.9                                      | 7.26                                     | 61.4a      |
| P value                  | Light regime      | 0.11ns                  | 0.19ns                                    | 0.25ns                                   | 0.009**    |
|                          | EC                | 0.003**                 | 0.82ns                                    | 0.37ns                                   | 0.19ns     |
|                          | Light regime × EC | 0.09ns                  | 0.25ns                                    | 0.36ns                                   | 0.05*      |

ns= non-significant. Significance at the 0.05 probability level is indicated by \*, and significance at the 0.01 probability level by \*\*.

**Table S5.** Effect of supplementary light and nutrient solution electrical conductivity (EC) on leaf photosynthetic functioning of *Aechmea* 'Primera' plants. The former treatment included control (no supplementary light), R90B10 [90 % red (R) and 10 % blue (B)], R80B20 (80 % R and 20 % B), and R70B30 (70 % R and 30 % B), while the latter 1 and 2 dS m<sup>-1</sup>. Four replicates were assessed per treatment. In traits, where the interaction of the two factors (light regime, EC) was significant, different letters indicate significant differences.

| EC (dS m <sup>-1</sup> ) | Light regime | F <sub>v</sub> /F <sub>m</sub> | NPQ   | PI <sub>ABS</sub> | F <sub>v</sub> '/F <sub>m</sub> '-L1 | F <sub>v</sub> '/F <sub>m</sub> '-L2 | F <sub>v</sub> '/F <sub>m</sub> '-L3 | F <sub>v</sub> '/F <sub>m</sub> '-L4 | F <sub>v</sub> '/F <sub>m</sub> '-L5 |
|--------------------------|--------------|--------------------------------|-------|-------------------|--------------------------------------|--------------------------------------|--------------------------------------|--------------------------------------|--------------------------------------|
| 1                        | Control      | 0.822                          | 2.267 | 2.18              | 0.360                                | 0.270                                | 0.233                                | 0.185                                | 0.110                                |
|                          | R90B10       | 0.8                            | 2.26  | 1.911             | 0.228                                | 0.198                                | 0.178                                | 0.138                                | 0.088                                |
|                          | R80B20       | 0.81                           | 1.82  | 2.191             | 0.323                                | 0.243                                | 0.210                                | 0.170                                | 0.93                                 |
|                          | R70B30       | 0.817                          | 1.94  | 2.239             | 0.363                                | 0.258                                | 0.225                                | 0.183                                | 0.113                                |
| 2                        | Control      | 0.822                          | 2.217 | 2.029             | 0.360                                | 0.273                                | 0.240                                | 0.195                                | 0.115                                |
|                          | R90B10       | 0.795                          | 2.112 | 1.305             | 0.405                                | 0.278                                | 0.230                                | 0.168                                | 0.090                                |
|                          | R80B20       | 0.81                           | 1.802 | 1.827             | 0.390                                | 0.278                                | 0.245                                | 0.195                                | 0.100                                |
|                          | R70B30       | 0.81                           | 1.627 | 2.118             | 0.368                                | 0.243                                | 0.208                                | 0.163                                | 0.093                                |

|         |                   |         |         |         |         |         |         |         |         |
|---------|-------------------|---------|---------|---------|---------|---------|---------|---------|---------|
| P value | Light regime      | 0.005** | 0.068ns | 0.212ns | 0.899ns | 0.569ns | 0.689ns | 0.526ns | 0.637ns |
|         | EC                | 0.324ns | 0.593ns | 0.261ns | 0.063ns | 0.382ns | 0.490ns | 0.735ns | 0.919ns |
|         | Light regime × EC | 0.769ns | 0.971ns | 0.907ns | 0.287ns | 0.646ns | 0.819ns | 0.925ns | 0.949ns |

ns= non-significant. Significance at the 0.05 probability level is indicated by \*, and significance at the 0.01 probability level by \*\*.

F<sub>v</sub>/F<sub>m</sub>, ratio of variable to maximum fluorescence; NPQ, non-photochemical quenching; PI<sub>ABS</sub>, performance index for the photochemical activity;.

F<sub>v</sub>'/F<sub>m</sub>'-L1 to L5 are related to measuring photosystem II efficiency under 100, 200, 300, 500, and 1000 μmol m<sup>-2</sup> s<sup>-1</sup> light intensity, respectively.

**Table S6.** Effect of supplementary light and nutrient solution electrical conductivity (EC) on leaf photosynthetic functioning of Guzmania ‘Rostara’ plants. The former treatment included control (no supplementary light), R90B10 [90 % red (R) and 10 % blue (B)], R80B20 (80 % R and 20 % B), and R70B30 (70 % R and 30 % B), while the latter 1 and 2 dS m<sup>-1</sup>. Four replicates were assessed per treatment. In traits, where the interaction of the two factors (light regime, EC) was significant, different letters indicate significant differences.

| EC (dS m <sup>-1</sup> ) | Light regime      | F <sub>v</sub> /F <sub>m</sub> | NPQ     | PI <sub>ABS</sub> | F <sub>v</sub> '/F <sub>m</sub> '-L1 | F <sub>v</sub> '/F <sub>m</sub> '-L2 | F <sub>v</sub> '/F <sub>m</sub> '-L3 | F <sub>v</sub> '/F <sub>m</sub> '-L4 | F <sub>v</sub> '/F <sub>m</sub> '-L5 |
|--------------------------|-------------------|--------------------------------|---------|-------------------|--------------------------------------|--------------------------------------|--------------------------------------|--------------------------------------|--------------------------------------|
| 1                        | Control           | 0.845                          | 2.595   | 1.52bc            | 0.335                                | 0.310                                | 0.280                                | 0.168                                | 0.068                                |
|                          | R90B10            | 0.835                          | 1.762   | 1.97ab            | 0.360                                | 0.320                                | 0.313                                | 0.235                                | 0.103                                |
|                          | R80B20            | 0.85                           | 1.355   | 2.31a             | 0.270                                | 0.233                                | 0.233                                | 0.203                                | 0.117                                |
|                          | R70B30            | 0.855                          | 2.272   | 1.15a             | 0.368                                | 0.330                                | 0.318                                | 0.220                                | 0.098                                |
| 2                        | Control           | 0.847                          | 1.852   | 1.93ab            | 0.335                                | 0.288                                | 0.243                                | 0.188                                | 0.043                                |
|                          | R90B10            | 0.837                          | 1.522   | 1.17c             | 0.303                                | 0.263                                | 0.255                                | 0.170                                | 0.078                                |
|                          | R80B20            | 0.837                          | 1.345   | 2.03ab            | 0.248                                | 0.193                                | 0.183                                | 0.158                                | 0.100                                |
|                          | R70B30            | 0.84                           | 1.447   | 2.02ab            | 0.245                                | 0.190                                | 0.183                                | 0.168                                | 0.110                                |
| P value                  | Light regime      | 0.447ns                        | 0.002** | 0.0625*           | 0.007**                              | 0.011*                               | 0.073ns                              | 0.145ns                              | 0.001**                              |
|                          | EC                | 0.101ns                        | 0.039*  | 0.11ns            | 0.009**                              | 0.002**                              | 0.001**                              | 0.0005**                             | 0.079ns                              |
|                          | Light regime × EC | 0.138ns                        | 0.426ns | 0.02*             | 0.092ns                              | 0.128ns                              | 0.206ns                              | 0.937ns                              | 0.245ns                              |

ns= non-significant. Significance at the 0.05 probability level is indicated by \*, and significance at the 0.01 probability level by \*\*.

F<sub>v</sub>/F<sub>m</sub>, ratio of variable to maximum fluorescence; NPQ, non-photochemical quenching; PI<sub>ABS</sub>, performance index for the photochemical activity;.

F<sub>v</sub>'/F<sub>m</sub>'-L1 to L5 are related to measuring photosystem II efficiency under 100, 200, 300, 500, and 1000 μmol m<sup>-2</sup> s<sup>-1</sup> light intensity, respectively.#

**Table S7.** Effect of supplementary light and nutrient solution electrical conductivity (EC) on leaf photosynthetic functioning of Vriesea ‘Splendret’ plants. The former treatment included control (no supplementary light), R90B10 [90 % red (R) and 10 % blue (B)], R80B20 (80 % R and 20 % B), and R70B30 (70 % R and 30 % B), while the latter 1 and 2 dS m<sup>-1</sup>. Four replicates were assessed per treatment. In traits, where the interaction of the two factors (light regime, EC) was significant, different letters indicate significant differences.

| EC (dS m <sup>-1</sup> ) | Light regime | F <sub>v</sub> /F <sub>m</sub> | NPQ  | PI <sub>ABS</sub> | F <sub>v</sub> '/F <sub>m</sub> '-L1 | F <sub>v</sub> '/F <sub>m</sub> '-L2 | F <sub>v</sub> '/F <sub>m</sub> '-L3 | F <sub>v</sub> '/F <sub>m</sub> '-L4 | F <sub>v</sub> '/F <sub>m</sub> '-L5 |
|--------------------------|--------------|--------------------------------|------|-------------------|--------------------------------------|--------------------------------------|--------------------------------------|--------------------------------------|--------------------------------------|
| 1                        | Control      | 0.807                          | 2.2  | 0.91              | 0.218                                | 0.208a                               | 0.222                                | 0.178                                | 0.063                                |
|                          | R90B10       | 0.73                           | 2.01 | 0.888             | 0.178                                | 0.155a-c                             | 0.183                                | 0.168                                | 0.070                                |

|         |                   |         |        |         |         |         |         |         |         |
|---------|-------------------|---------|--------|---------|---------|---------|---------|---------|---------|
|         | R80B20            | 0.807   | 1.97   | 0.87    | 0.123   | 0.085c  | 0.095   | 0.095   | 0.063   |
|         | R70B30            | 0.842   | 1.64   | 1.38    | 0.158   | 0.120bc | 0.135   | 0.140   | 0.110   |
| 2       | Control           | 0.812   | 1.79   | 1.418   | 0.150   | 0.103c  | 0.107   | 0.100   | 0.060   |
|         | R90B10            | 0.74    | 1.81   | 0.489   | 0.203   | 0.180ab | 0.200   | 0.183   | 0.107   |
|         | R80B20            | 0.84    | 2.14   | 0.789   | 0.160   | 0.108c  | 0.083   | 0.085   | 0.063   |
|         | R70B30            | 0.792   | 1.98   | 0.747   | 0.128   | 0.093c  | 0.103   | 0.105   | 0.075   |
| P value | Light regime      | 0.012*  | 0.69ns | 0.205ns | 0.029*  | 0.012*  | 0.007** | 0.044*  | 0.213ns |
|         | EC                | 0.973ns | 0.83ns | 0.384ns | 0.474ns | 0.094ns | 0.033*  | 0.076ns | 0.694ns |
|         | Light regime × EC | 0.462ns | 0.15ns | 0.149ns | 0.061ns | 0.032*  | 0.095ns | 0.232ns | 0.201ns |

ns= non-significant. Significance at the 0.05 probability level is indicated by \*, and significance at the 0.01 probability level by \*\*.

F<sub>v</sub>/F<sub>m</sub>, ratio of variable to maximum fluorescence; NPQ, non-photochemical quenching; PI<sub>ABS</sub>, performance index for the photochemical activity;

F<sub>v</sub>'/F<sub>m</sub>'-L1 to L5 are related to measuring photosystem II efficiency under 100, 200, 300, 500, and 1000 μmol m<sup>-2</sup> s<sup>-1</sup> light intensity, respectively.
